# Supplementary material for: Recognition, remuneration and reimbursement of patient and public involvement partners in pragmatic randomised controlled trials. A survey of author practices
Source: Research Square preprint supplement (doi:10.21203/rs.3.rs-6727717/v1), 2025-06-02
Supplement: Supplementary file 1 [file 4fc2a50f8c6b552c1a80888d.docx]

Checklist for Reporting Results of Internet E-Surveys (CHERRIES)

| Item category | Checklist item | Explanation | Page(s) |
| --- | --- | --- | --- |
| Design | Describe survey design | Describe target population, sample frame. Is  the sample a convenience sample? (In  “open” surveys this is most likely.) | 6-7 |
| IRB (Institutional  Review Board)  approval and  informed consent  process | IRB approval | Mention whether the study has been  approved by an IRB. | 8 |
|  | Informed consent | Describe the informed consent process.  Where were the participants told the length of  time of the survey, which data were stored  and where and for how long, who the  investigator was, and the purpose of the  study? | 8 |
|  | Data protection | If any personal information was collected or  stored, describe what mechanisms were  used to protect unauthorized access. | N/A |
| Development and  pre-testing | Development and  testing | State how the survey was developed,  including whether the usability and technical  functionality of the electronic questionnaire  had been tested before fielding the  questionnaire. | 6-8 |
| Recruitment  process and  description of the  sample having  access to the  questionnaire | Open survey versus  closed survey | An “open survey” is a survey open for each  visitor of a site, while a closed survey is only  open to a sample which the investigator  knows (password-protected survey). | 7-8 |
|  | Contact mode | Indicate whether or not the initial contact with  the potential participants was made on the  Internet. (Investigators may also send out  questionnaires by mail and allow for Web-based data entry.) | 7-8 |
|  | Advertising the survey | How/where was the survey announced or  advertised? Some examples are offline  media (newspapers), or online (mailing lists –  If yes, which ones?) or banner ads (Where  were these banner ads posted and what did  they look like?). It is important to know the  wording of the announcement as it will  heavily influence who chooses to participate.  Ideally the survey announcement should be  published as an appendix. | 7-8 |
| Survey  administration | Web/E-mail | State the type of e-survey (eg, one posted on  a Web site, or one sent out through e-mail). If  it is an e-mail survey, were the responses  entered manually into a database, or was  there an automatic method for capturing  responses? | 7 |
|  | Context | Describe the Web site (for mailing  list/newsgroup) in which the survey was  posted. What is the Web site about, who is  visiting it, what are visitors normally looking  for? Discuss to what degree the content of  the Web site could pre-select the sample or  influence the results. For example, a survey  about vaccination on a anti-immunization  Web site will have different results from a  Web survey conducted on a government  Web site | 7 |
|  | Mandatory/voluntary | Was it a mandatory survey to be filled in by  every visitor who wanted to enter the Web  site, or was it a voluntary survey? | 8 |
|  | Incentives | Were any incentives offered (eg, monetary,  prizes, or non-monetary incentives such as  an offer to provide the survey results)? | 8 |
|  | Time/Date | In what timeframe were the data collected? | 8 |
|  | Randomization of items  or questionnaires | To prevent biases items can be randomized  or alternated. | N/A |
|  | Adaptive questioning | Use adaptive questioning (certain items, or  only conditionally displayed based on responses to other items) to reduce number and complexity of the questions. | N/A |
|  | Number of Items What was the number of questionnaire items | What was the number of questionnaire items  per page? The number of items is an  important factor for the completion rate. | 7 |
|  | Number of screens  (pages) | Over how many pages was the questionnaire  distributed? The number of items is an  important factor for the completion rate | N/A |
|  | Completeness check | It is technically possible to do consistency or  completeness checks before the  questionnaire is submitted. Was this done,  and if “yes”, how (usually JAVAScript)? An  alternative is to check for completeness after  the questionnaire has been submitted (and  highlight mandatory items). If this has been  done, it should be reported. All items should  provide a non-response option such as “not  applicable” or “rather not say”, and selection  of one response option should be enforced | N/A |
|  | Review step | State whether respondents were able to  review and change their answers (eg,  through a Back button or a Review step  which displays a summary of the responses  and asks the respondents if they are correct). | N/A |
| Response rates | Unique site visitor | If you provide view rates or participation  rates, you need to define how you  determined a unique visitor. There are  different techniques available, based on IP  addresses or cookies or both. | N/A |
|  | View rate (Ratio unique  site visitors/unique  survey visitors) | Requires counting unique site visitors (not  page views!) divided by the number of unique  visitors of the first page of the survey. It is not  unusual to have view rates of less than 0.1 %  if the survey is voluntary. | N/A |
|  | Participation rate (Ratio  unique survey page  visitors/agreed to participate) | Count the unique number of visitors who visit  the first page of the survey (or the informed  consents page, if present) divided by the  number of people who filled in the first survey page (or agreed to participate). This can also  be called “recruitment” rate. | N/A |
|  | Completion rate (Ratio  agreed to  participate/finished  survey) | The number of people agreeing to participate  (or submitting the first survey page) divided  by the number of people submitting the last  questionnaire page. This is only relevant if  there is a separate “informed consent” page  or if the survey goes over several pages. This  is a measure for attrition. Note that  “completion” can involve leaving  questionnaire items blank. This is not a  measure for how completely questionnaires  were filled in. (If you need a measure for this,  use the word “completeness rate”.) | N/A |
| Preventing multiple  entries from the  same individual | Cookies used | Indicate whether cookies were used to assign  a unique user identifier to each client  computer. If so, mention the page on which  the cookie was set and read, and how long  the cookie was valid. Were duplicate entries  avoided by preventing users access to the  survey twice; or were duplicate database  entries having the same user ID eliminated  before analysis? In the latter case, which  entries were kept for analysis (eg, the first  entry or the most recent)? | N/A |
|  | IP check | Indicate whether the IP address of the client  computer was used to identify potential  duplicate entries from the same user. If so,  mention the period of time for which no two  entries from the same IP address were  allowed (eg, 24 hours). Were duplicate  entries avoided by preventing users with the  same IP address access to the survey twice;  or were duplicate database entries having the  same IP address within a given period of time  eliminated before analysis? If the latter, which  entries were kept for analysis (eg, the first  entry or the most recent)? | N/A |
|  | Log file analysis | Indicate whether other techniques to analyze  the log file for identification of multiple entries  were used. If so, please describe. | N/A |
|  | Registration | In “closed” (non-open) surveys, users need to  login first and it is easier to prevent duplicate  entries from the same user. Describe how  this was done. For example, was the survey  never displayed a second time once the user  had filled it in, or was the username stored  together with the survey results and later  eliminated? If the latter, which entries were  kept for analysis (eg, the first entry or the  most recent)? | N/A |
| Analysis | Handling of incomplete  questionnaires | Were only completed questionnaires  analyzed? Were questionnaires which  terminated early (where, for example, users  did not go through all questionnaire pages)  also analyzed? | 9 |
|  | Questionnaires  submitted with an  atypical timestamp | Some investigators may measure the time  people needed to fill in a questionnaire and  exclude questionnaires that were submitted  too soon. Specify the timeframe that was  used as a cut-off point, and describe how this  point was determined. | N/A |
|  | Statistical correction | Indicate whether any methods such as  weighting of items or propensity scores have  been used to adjust for the nonrepresentative sample; if so, please describe  the methods | N/A |
|  |  |  |  |

Eysenbach, G. (2004). Improving the quality of web surveys: the checklist for reporting results of internet e‐surveys (cherries). Journal of medical Internet research, 6(3)e34 doi:10.2196/jmir.6.3.e34 http://www.jmir.org/2004/3/e34/
