# Supplementary material for: Recognition, remuneration and reimbursement of patient and public involvement partners in pragmatic randomised controlled trials. A survey of author practices
Source: Research Square preprint supplement (doi:10.21203/rs.3.rs-6727717/v1), 2025-06-02
Supplement: Supplementary file 2 [file b77bd394a2fd0336fc44f582.docx]

**Appendix 2: GRIPP2-SF**

| Section and topic | Item | Reported in Page No |
| --- | --- | --- |
| 1: Aim | Report the aim of PPI in the study | 7 |
| 2: Method | Provide a clear description of the methods used for PPI in the study | 7 |
| 3. Study results | Outcomes—Report the results of PPI in the study, including both positive and negative outcomes | 7 |
| 4. Discussion and conclusions | Outcomes—Comment on the extent to which PPI influenced the study overall. Describe positive and negative effects | 7 |
| 5. Reflections/critical perspective | Comment critically on the study, reflecting on the things that went well and those that did not, so others can learn from this experience | N/A |
